1 **Title: Insight into motility-dependent pathogenicity of the zoonotic spirochete**

2 *Leptospira*

3 **Short title:** Motility-dependent spirochetal pathogenicity

4 **Authors:** Jun Xu<sup>1\*</sup>, Nobuo Koizumi<sup>2</sup>, Shuichi Nakamura<sup>3</sup>

5 **Affiliations:**

6 <sup>1</sup>Department of Animal Microbiology, Graduate School of Agricultural Science, Tohoku University,  
7 Sendai, Miyagi, Japan

8 <sup>2</sup>Department of Bacteriology I, National Institute of Infectious Diseases, Shinjuku-ku, Tokyo, Japan

9 <sup>3</sup>Department of Applied Physics, Graduate School of Engineering, Tohoku University, Sendai,  
10 Miyagi, Japan

11 **Corresponding author:** Shuichi Nakamura, Department of Applied Physics, Graduate School of  
12 Engineering, Tohoku University, 6-6-05 Aoba, Aoba-ku, Sendai, Miyagi 980-8579, Japan.

13 Contact: [naka@bp.apph.tohoku.ac.jp](mailto:naka@bp.apph.tohoku.ac.jp)

14 **\*Present address:** Department of Bacteriology, Graduate School of Medicine, University of the  
15 Ryukyus

16

## 17 **Abstract**

18 Bacterial motility is crucial for many pathogenic species in the process of invasion and/or  
19 dissemination. The spirochete bacteria *Leptospira* spp. cause symptoms, such as hemorrhage,  
20 jaundice, and nephritis, in diverse mammals including humans. Although loss-of-motility attenuate  
21 the spirochete, the mechanism of the motility-dependent pathogenicity is unknown. Here, focusing  
22 on that *Leptospira* spp. swim in liquid and crawl on solid surfaces, we investigated the spirochetal  
23 dynamics on the host tissues by infecting cultured kidney cells from various species with pathogenic  
24 and nonpathogenic leptospires. We found that, in the case of the pathogenic leptospires, a larger  
25 fraction of bacteria attached to the host cells and persistently traveled long distances using the  
26 crawling mechanism. Our results associate the kinetics and kinematic features of the spirochetal  
27 pathogens with their virulence.

28 **One Sentence Summary:** Adhesivity and crawling motility over host tissue surfaces are closely  
29 related to the pathogenicity of a zoonotic spirochete.

## 31 **Introduction**

32 Many bacteria utilize motility to explore environments for survival and prosperity. For  
33 pathogenic species, the motility is a virulence factor, harming the host animal or plant health(6). For  
34 example, *Helicobacter pylori* requires motility to migrate towards the epithelial tissue in the  
35 stomach(7), and motility and chemotaxis are key factors that guide host invasion in different  
36 *Salmonella* serovars (8, 9). Movement and adhesion of the Lyme disease spirochete *Borrelia*  
37 *burgdorferi* in blood vessels are thought to be important during the process of host cell invasion(10).  
38 In the enteric pathogens, such as the enteropathogenic *Escherichia coli* (EPEC), the motility

39 machinery flagella are also important for adhesion to the host intestinal epithelium(11).

40 In this study, we address the association of bacterial motility with pathogenicity in the  
41 worldwide zoonosis leptospirosis. The causative agent of leptospirosis *Leptospira* spp. are  
42 Gram-negative bacteria belonging to the phylum Spirochaetes. The genus *Leptospira* is comprised of  
43 pathogenic, intermediate, and nonpathogenic species, which are classified into over 300 serovars  
44 defined based on the structural diversity of lipopolysaccharide (LPS)(2, 12). The pathogenic species  
45 affect various mammalian hosts such as livestock (cattle, pigs, horses, and others),  
46 companion animals (dogs and others), and humans, causing severe symptoms, such as hemorrhage,  
47 jaundice, and nephritis in some host-serovar pairs(2–4). The leptospire can be maintained in the  
48 renal tubules of recovered animals or reservoir hosts, and the urinary shedding of leptospire to the  
49 environment leads to infection in humans and other animals through contact with contaminated soil  
50 or water. Although the pathogenic mechanism of leptospirosis is not well elucidated, in addition to  
51 the pathogen-specific proteins such as Loa22(13), their motility using two periplasmic flagella  
52 (PFs) beneath the outer cell membrane (Fig. 1A) is known to be somehow involved in the infection  
53 and pathogenicity based on studies in animal models that have shown attenuation of the spirochetes  
54 by loss-of-motility(14, 15).

55 The rotation of the PFs in *Leptospira* gyrates both ends of the cell body and rotates the coiled  
56 cell body, allowing the spirochete not only to swim in fluids but also to crawl over solid surfaces(16,  
57 17). Adherence and entry of pathogenic leptospire in the conjunctival epithelium(4) and in the  
58 paracellular routes of hepatocytes(18) were previously observed using scanning electron microscopy,  
59 suggesting adhesion to the host tissue surfaces and subsequent crawling of pathogenic leptospire. To  
60 verify this hypothesis, assuming the transition of leptospire between swimming and adhesion states

61 and between adhesion and crawling states in the equilibrium (Fig. 1B), we investigated the adhesion  
62 and crawling motility of *Leptospira* on the cultured kidney cells of various mammalian species.

63

## 64 **Results**

65 **Steady-state analysis of *Leptospira* on the kidney cells.** We infected cultured kidney cells from six  
66 different host species (rat, dog, monkey, mouse, cow, and human) with three *Leptospira* strains (the  
67 pathogenic *L. interrogans* serovars Icterohaemorrhagiae and Manilae, and the nonpathogenic *L.*  
68 *biflexa* serovar Patoc) expressing green fluorescent protein (GFP) within a chamber slide (Fig. 2A).  
69 We observed the *Leptospira* cells by epi-fluorescent microscopy (Fig. 2B) and measured the  
70 fractions of swimming [S], adhered [A], and crawling [C] bacteria on the kidney cells (Fig. 2C). Figs.  
71 2D-E show that almost half of the pathogenic population transited from the swimming state to the  
72 adhesion and crawling states, whereas >75% non-pathogenic leptospires remained in the swimming  
73 state. We calculated the equilibrium constant between swimming and adhesion states ( $K_{S-A}$ ) and  
74 between adhesion and crawling states ( $K_{A-C}$ ) from the cell fractions using  $K_{S-A} = [A] / [S]$  and  $K_{A-C} =$   
75  $[C] / [A]$ , respectively. The pathogenic leptospires had a significantly larger  $K_{A-C}$  in comparison with  
76 the nonpathogenic strain ( $P < 0.05$ );  $K_{S-A}$  did not seem to correlate to virulence (Fig. 2F). These  
77 thermodynamic parameters suggest that the biased transition from adhesion to crawling would be  
78 responsible for the virulence of *Leptospira* (Fig. 2G).

79

80 **Crawling motility.** Taking the results of the steady-state analysis, we focused on the crawling  
81 motility of individual *Leptospira* cells on the kidney cells. Although the crawling speed varied  
82 among the measured host-bacterium pairs, *L. interrogans* serovar Icterohaemorrhagiae showed

83 significantly faster speed than the others, indicating the species/serovar dependence of the crawling  
84 ability (Fig. 3A). On the other hand, there is no difference in crawling speed between *L. interrogans*  
85 serovar Manilae and *L. biflexa* serovar Patoc, suggesting that the crawling speed itself is not related  
86 to leptospiral virulence. Meanwhile, we observed that some leptospiral cells attached to the kidney  
87 cells and moved smoothly for periods, migrating over long-distances (upper panels of Figs. 3B-C;  
88 Movie S2), whereas others frequently reversed the crawling direction (lower panels of Figs. 3B-C;  
89 Movie S3). Cell movements with reversals are considered to be diffusive and thus can be evaluated  
90 by plotting the mean square displacement (MSD) against time, a general methodology for diffusion  
91 (Brownian motion) analysis(19). The MSD of simple diffusion without directivity is proportional to  
92 time, and therefore double-logarithmic MSD plots from such non-directional diffusion represent  
93 slopes of  $\sim 1$ , whereas those from directive movements show MSD slopes of  $\sim 2$ , representing the  
94 relatively long distance traveled by the cells (Fig. S1). Double-logarithmic MSD plots obtained from  
95 each individual leptospire showed a wide range of MSD slopes (example data are shown in Fig. 3D)  
96 and differed for each host-*Leptospira* pair (Fig. 3E left and Fig. S2). The nonpathogenic strain  
97 showed the slope of  $\sim 1$ , while the pathogenic strains had significantly larger slopes that denote  
98 directive motion (Fig. 3E right). Thus, concerning the crawling motility, directivity and persistency  
99 rather than speed could be crucial for virulence.

100

## 101 **Discussion**

102 Our results suggested the importance of adhesion to and persistent crawling on the host tissue for the  
103 pathogenicity of *Leptospira*. The thermodynamic and kinematic parameters are associated in Fig 4A,  
104 showing the tendency that pathogenic species are biased to the crawling state and can migrate longer

105 distance on the host tissue surfaces. The crawling motility of *Leptospira* is caused by the attachment  
106 of the spirochete cell body to surfaces via adhesive cell surface components(16, 20). The successive  
107 alternation in the attachment and detachment of adhesins allows for this progressive movement by  
108 the spirochetes, however, an excessively strong adhesion can inhibit crawling(16). LPS, the  
109 molecular basis for the identification of the different *Leptospira* serovars(2, 12), is thought to be a  
110 crucial adhesin important for this crawling motion(16). Thus, it is possible that compatibility of the  
111 serological characteristics of leptospires and the surface properties of the host tissue might affect the  
112 crawling behavior over the tissue surfaces and the subsequent clinical consequences. The results of  
113 our biophysical experiments outline a plausible framework for the adhesion and crawling-dependent  
114 pathogenicity of *Leptospira* (Fig. 4B). The biased transition from the adhesion to the crawling state  
115 and the long-distance, persistent crawling allows leptospires to explore the host's cell surfaces,  
116 increasing the probability of encountering routes for invasion through their intracellular tight  
117 junctions (Fig. 4B, left). In contrast, the swimming or weakly attached leptospires can be swept by  
118 external forces, such as intermittent urination, and diffusive crawling by which leptospires cannot be  
119 disseminated over host tissues will not be involved in invasion (Fig. 4B, right).

120 Some bacterial pathogens are specialized to invade a very limited array of hosts, whereas others  
121 can infect multiple host species. The host range differs for each pathogen and the clinical symptoms  
122 depend on each host-pathogen combination. The same applies for leptospirosis, the outcome of  
123 *Leptospira* infection depends on the host-serovar association, and some animal species can become  
124 an asymptomatic reservoir for particular *Leptospira* serovars. The present experiments also provided  
125 data allowing us to discuss the host dependence of the leptospiral dynamics. Among the investigated  
126 materials, serovar Manilae vs rats and serovar Icterohaemorrhagiae vs rats are typically

127 asymptomatic pairs, and Fig. 4A shows that the pairs with reservoirs have lower scores in  
128 comparison with those causing severe symptoms, such as Manilae vs humans, Icterohaemorrhagiae  
129 vs dogs, and others. This implies that the surface dynamics of the spirochete could be related to their  
130 host-dependent pathogenicity. Understanding the mechanism of the host preferences by pathogens is  
131 important for prevention of the infection spread, but the host-pathogen association in leptospirosis is  
132 ambiguous. Also, microarray analyses have revealed that regulation of gene expression in *Leptospira*  
133 is affected by its interaction with host cells(21, 22). Although host immune responses against  
134 *Leptospira* infection remain mostly unknown, pathogenic leptospire interfere with the complement  
135 system through the degradation of complement proteins(23) and inhibition of coagulation via binding  
136 to thrombin(24). Thus, abundant factors in both bacteria and hosts should be investigated for a  
137 deeper understanding of the host-dependent pathogenicity.

138

## 139 **Materials and Methods**

140 ***Leptospira* strains and growth conditions.** Pathogenic serovars of *L. interrogans* serovar  
141 Icterohaemorrhagiae (strain WFA135), an isolate from *Rattus norvegicus* in Tokyo, Japan, serovar  
142 Manilae (strain UP-MMC-NIID)(25, 26) and a saprophytic *L. biflexa* serovar Patoc (strain Patoc I)  
143 were used in this study. The serovar of WFA135 was determined by multiple loci variable number of  
144 tandem repeats analysis (MLVA) and DNA sequencing of the *lic12008* gene(26, 27). Bacteria were  
145 cultured in enriched Ellinghausen-McCullough-Johnson-Harris (EMJH) liquid medium (BD Difco,  
146 NJ, USA) containing 25 µg/mL spectinomycin at 30 °C for 2 (*L. biflexa*) or 4 (*L. interrogans*) days  
147 until the stationary phase. To track *Leptospira* cells when in co-culture with mammalian kidney cells,  
148 a green fluorescent protein (GFP) was constitutively expressed in each strain (Fig. 1D; Movie S1).

149

150 **Mammalian cells and media.** Mammalian kidney epithelial cell lines used included MDCK-NBL2  
151 (dog), NRK-52E (rat), Vero (monkey), MDBK-NBL1 (cow), TCMK-1 (mouse), and HK-2 (human).  
152 MDCK, Vero, TCMK, and MDBK cells were maintained in Eagle's minimum essential media  
153 (MEM) (Sigma-Aldrich, Darmstadt, Germany) containing 10% fetal bovine serum or 10% horse  
154 serum (Nacalai Tesque, Kyoto, Japan) at 37 °C and 5% CO<sub>2</sub>. NRK cells were maintained in  
155 Dulbecco's modified Eagle's media (DMEM) (Thermo Fisher Scientific, MA, USA) with 4 mM  
156 L-glutamine, adjusted to contain 1.5 g/L sodium bicarbonate and 4.5 g/L glucose, and with 5%  
157 bovine calf serum (Nacalai Tesque) at 37 °C and 5% CO<sub>2</sub>. HK-2 cells were maintained in  
158 keratinocyte serum-free (KSF) media with 0.05 mg/mL bovine pituitary extract and 5 ng/mL human  
159 recombinant epidermal growth factor (Gibco - Thermo Fisher Scientific, MA, USA). All culture  
160 conditions contained a 5% antibiotic / antimycotic mixed solution (Nacalai Tesque). Cells were  
161 treated with a 0.1% trypsin - EDTA solution (Nacalai Tesque) to dislodge the cells during each  
162 passage process.

163

164 **GFP expression in *L. interrogans* and *L. biflexa*.** For the construction of a replicable plasmid in *L.*  
165 *interrogans*, the corresponding *rep-parB-parA* region of the plasmid pGui1 from the *L. interrogans*  
166 serovar Canicola strain Gui44 plasmid pGui1(28) was amplified from a *L. interrogans* serogroup  
167 Canicola isolate, and the amplified product was cloned into the PCR-generated pCjSpLe94(29) by  
168 NEBuilder HiFi DNA Assembly cloning (New England BioLabs), generating pNKLiG1. The *flgC*  
169 promoter region and *gfp* were amplified from pCjSpLe94 and pAcGFP1 (Clontech), respectively,  
170 and the amplified products were cloned into the *SalI*-digested pNKLiG1 for *L. interrogans* or the



171 *SalI*-digested pCjSpLe94 for *L. biflexa*. The plasmids were transformed into strains WFA135,  
172 UP-MMC-NIID or Patoc I by conjugation with *E. coli*  $\beta$ 2163 harboring the plasmid(30). Primer  
173 sequences used in this study are listed in Table S1. Expression of GFP did not affect motility in the  
174 *Leptospira* serovars (Fig. S3).

175

176 **Preparation of kidney cells and *Leptospira* cells in a chamber slide.** Kidney cells were harvested  
177 with 0.1% trypsin and 0.02% EDTA in a balanced salt solution (Nacalai Tesque) and plated onto a  
178 chamber slide (Iwaki, Tokyo, Japan) using their corresponding media without antibiotics. The slides  
179 were incubated for 48 h until a monolayer was formed and washed twice with media to remove  
180 non-adherent cells. The cells were incubated for a further 2 h at 37 °C and 5% CO<sub>2</sub>. Approximately  
181 500 ml of stationary phase *Leptospira* cells were harvested by centrifugation at 1,000 g for 10 min at  
182 room temperature, washed twice in PBS, then resuspended in the corresponding kidney cell culture  
183 media without antibiotics at 37 °C to a concentration of 10<sup>7</sup> cells / ml. These suspensions (1 ml) were  
184 then added into the corresponding chamber slides containing the kidney cell layer, and the chamber  
185 slides were incubated at 37 °C for 1 h.

186

187 **Microscopy observation and adhesion-crawling assay.** The movement behaviors, swimming,  
188 adhesion and crawling of the *Leptospira* cells on the kidney cells were observed using a dark-field  
189 microscope (BX53, Splan 40 $\times$ , NA 0.75, Olympus, Tokyo, Japan) with an epi-fluorescent system  
190 (U-FBNA narrow filter, Olympus) and recorded by a CCD-camera (WAT- 910HX, Watec Co.,  
191 Yamagata, Japan) at 30 frames per second. *Leptospira* cells were tracked using an ImageJ (NIH, MD,  
192 USA)-based tracking system and the motion parameters such as motile fraction, velocity and MSD

193 were analyzed using Excel-based VBA (Microsoft, WA, USA). The two-dimensional MSD of  
194 individual leptospiral cells during a period  $\Delta t$  was calculated by the following equation:  $MSD(\Delta t) =$   
195  $\langle (x_{i+\Delta t} - x_i)^2 + (y_{i+\Delta t} - y_i)^2 \rangle$ , where  $(x_i, y_i)$  is the bacterial position at  $I$  (see also Supplementary  
196 Fig. 1).

197

198 **Statistical analysis.** All experiments were performed in triplicate. Statistical differences between  
199 data were evaluated using a Student's  $t$ -test. The data clustering was performed independently for  
200 each experiment using the k-means method in OriginPro (OriginLab Corp., MA, USA). The  
201 clustering method grouped the data population into a specified number of clusters referring to the  
202 Euclidian distance of each data point from the centroid of the cluster, calculated at every clustering  
203 process, and reclassifying the data point to the nearest cluster.

204

## 205 **Supplementary Materials**

206 Tables S1. Primer sequences used in this study

207 Fig. S1. Explanation of MSD plot.

208 Fig. S2. Histograms of the MSD slopes

209 Fig. S3. Effect of GFP expression on the *Leptospira* motility.

210 Movie S1. Epi-fluorescent images of *L. interrogans* on the rat kidney cell

211 Movie S2. Progressive, long-distance crawling of *L. interrogans* on the monkey kidney cells

212 Movie S3. Crawling of *L. interrogans* with highly frequent reversal on the dog kidney cells

213

## 214 **References**

- 215 1. A. Bäumlér, F. C. Fang, Host specificity of bacterial pathogens. *Cold Spring Harb. Perspect. Med.* **3** (2013),  
216 doi:10.1101/cshperspect.a010041.
- 217 2. M. Picardeau, Virulence of the zoonotic agent of leptospirosis: still terra incognita? *Nat. Rev. Microbiol.* **15**,  
218 297–307 (2017).
- 219 3. B. Adler, A. de la Peña Moctezuma, *Leptospira* and leptospirosis. *Vet. Microbiol.* **140**, 287–296 (2010).
- 220 4. A. R. Bharti, J. E. Nally, J. N. Ricaldi, M. A. Matthias, M. M. Diaz, M. A. Lovett, P. N. Levett, R. H. Gilman,  
221 M. R. Willig, E. Gotuzzo, J. M. Vinetz, Peru-United States Leptospirosis Consortium, Leptospirosis: a  
222 zoonotic disease of global importance. *Lancet Infect. Dis.* **3**, 757–771 (2003).
- 223 5. P. N. Levett, Leptospirosis. *Clin. Microbiol. Rev.* **14**, 296–326 (2001).
- 224 6. C. Josenhans, S. Suerbaum, The role of motility as a virulence factor in bacteria. *Int. J. Med. Microbiol.* **291**,  
225 605–614 (2002).
- 226 7. M. Clyne, T. Ocroinin, S. Suerbaum, C. Josenhans, B. Drumm, Adherence of isogenic flagellum-negative  
227 mutants of *Helicobacter pylori* and *Helicobacter mustelae* to human and ferret gastric epithelial cells. *Infect.*  
228 *Immun.* **68**, 4335–4339 (2000).
- 229 8. J. E. Olsen, K. H. Hoegh-Andersen, J. Casadesús, J. T. Rosenkrantz, M. S. Chadfield, L. E. Thomsen, The  
230 role of flagella and chemotaxis genes in host pathogen interaction of the host adapted *Salmonella enterica*  
231 serovar Dublin compared to the broad host range serovar *S. Typhimurium*. *BMC Microbiol.* **13**, 67 (2013).
- 232 9. A. Siitonen, M. Nurminen, Bacterial motility is a colonization factor in experimental urinary tract infection.  
233 *Infect. Immun.* **60**, 3918–3920 (1992).
- 234 10. R. Ebady, A. F. Niddam, A. E. Boczula, Y. R. Kim, N. Gupta, T. T. Tang, T. Odisho, H. Zhi, C. A. Simmons, J.  
235 T. Skare, T. J. Moriarty, Biomechanics of *Borrelia burgdorferi* vascular interactions. *Cell Rep.* **16**, 2593–2604  
236 (2016).

- 237 11. C. P. Cheney, P. A. Schad, S. B. Formal, E. C. Boedeker, Species specificity of *in vitro* *Escherichia coli*  
238 adherence to host intestinal cell membranes and its correlation with *in vivo* colonization and infectivity. *Infect.*  
239 *Immun.* **28**, 1019–1027 (1980).
- 240 12. G. M. Cerqueira, M. Picardeau, A century of *Leptospira* strain typing. *Infect. Genet. Evol. J. Mol. Epidemiol.*  
241 *Evol. Genet. Infect. Dis.* **9**, 760–768 (2009).
- 242 13. P. Ristow, P. Bourhy, F. W. da Cruz McBride, C. P. Figueira, M. Huerre, P. Ave, I. S. Girons, A. I. Ko, M.  
243 Picardeau, The OmpA-like protein Loa22 is essential for leptospiral virulence. *PLoS Pathog.* **3**, e97 (2007).
- 244 14. A. Lambert, M. Picardeau, D. A. Haake, R. W. Sermswan, A. Srikrum, B. Adler, G. A. Murray, FlaA proteins  
245 in *Leptospira interrogans* are essential for motility and virulence but are not required for formation of the  
246 flagellum sheath. *Infect. Immun.* **80**, 2019–2025 (2012).
- 247 15. E. A. Wunder, C. P. Figueira, N. Benaroudj, B. Hu, B. A. Tong, F. Trajtenberg, J. Liu, M. G. Reis, N. W.  
248 Charon, A. Buschiazzi, M. Picardeau, A. I. Ko, A novel flagellar sheath protein, FcpA, determines filament  
249 coiling, translational motility and virulence for the *Leptospira* spirochete. *Mol. Microbiol.* **101**, 457–470  
250 (2016).
- 251 16. H. Tahara, K. Takabe, Y. Sasaki, K. Kasuga, A. Kawamoto, N. Koizumi, S. Nakamura, The mechanism of  
252 two-phase motility in the spirochete *Leptospira*: Swimming and crawling. *Sci. Adv.* **4**, eaar7975 (2018).
- 253 17. P. J. Cox, G. I. Twigg, Leptospiral motility. *Nature.* **250**, 260–261 (1974).
- 254 18. S. Miyahara, M. Saito, T. Kanemaru, S. Y. A. M. Villanueva, N. G. Gloriani, S. Yoshida, Destruction of the  
255 hepatocyte junction by intercellular invasion of *Leptospira* causes jaundice in a hamster model of Weil's  
256 disease. *Int. J. Exp. Pathol.* **95**, 271–281 (2014).
- 257 19. A. Kusumi, Y. Sako, M. Yamamoto, Confined lateral diffusion of membrane receptors as studied by single  
258 particle tracking (nanovid microscopy). Effects of calcium-induced differentiation in cultured epithelial cells.

- 259 *Biophys. J.* **65**, 2021–2040 (1993).
- 260 20. N. W. Charon, C. W. Lawrence, S. O'Brien, Movement of antibody-coated latex beads attached to the  
261 spirochete *Leptospira interrogans*. *Proc. Natl. Acad. Sci. U. S. A.* **78**, 7166–7170 (1981).
- 262 21. K. Satou, M. Shimoji, H. Tamotsu, A. Juan, N. Ashimine, M. Shinzato, C. Toma, T. Nohara, A. Shiroma, K.  
263 Nakano, K. Teruya, Y. Terabayashi, S. Ohki, N. Koizumi, S. Okano, T. Suzuki, T. Hirano, Complete genome  
264 sequences of low-passage virulent and high-passage avirulent variants of pathogenic *Leptospira interrogans*  
265 serovar Manilae strain UP-MMC-NIID, originally isolated from a patient with severe leptospirosis,  
266 determined using PacBio single-molecule real-time technology. *Genome Announc.* **3** (2015),  
267 doi:10.1128/genomeA.00882-15.
- 268 22. C. Toma, G. L. Murray, T. Nohara, M. Mizuyama, N. Koizumi, B. Adler, T. Suzuki, Leptospiral outer  
269 membrane protein LMB216 is involved in enhancement of phagocytic uptake by macrophages. *Cell.*  
270 *Microbiol.* **16**, 1366–1377 (2014).
- 271 23. T. R. Fraga, D. D. S. Courrol, M. M. Castiblanco-Valencia, I. Y. Hirata, S. A. Vasconcellos, L. Juliano, A. S.  
272 Barbosa, L. Isaac, Immune evasion by pathogenic *Leptospira* strains: the secretion of proteases that directly  
273 cleave complement proteins. *J. Infect. Dis.* **209**, 876–886 (2014).
- 274 24. L. G. Fernandes, Z. M. de Moraes, S. A. Vasconcellos, A. L. T. O. Nascimento, *Leptospira interrogans*  
275 reduces fibrin clot formation by modulating human thrombin activity via exosite I. *Pathog. Dis.* **73** (2015),  
276 doi:10.1093/femspd/ftv001.
- 277 25. N. Koizumi, H. Watanabe, Leptospiral immunoglobulin-like proteins elicit protective immunity. *Vaccine.* **22**,  
278 1545–1552 (2004).
- 279 26. L. A. Santos, H. Adhikarla, X. Yan, Z. Wang, D. E. Fouts, J. M. Vinetz, L. C. J. Alcantara, R. A. Hartskeerl,  
280 M. G. A. Goris, M. Picardeau, M. G. Reis, J. P. Townsend, H. Zhao, A. I. Ko, E. A. Wunder, Genomic

- 281 comparison among global isolates of *L. interrogans* serovars Copenhageni and Icterohaemorrhagiae  
282 identified natural genetic variation caused by an Indel. *Front. Cell. Infect. Microbiol.* **8**, 193 (2018).
- 283 27. N. Koizumi, H. Izumiya, J.-J. Mu, Z. Arent, S. Okano, C. Nakajima, Y. Suzuki, M. Mizutani Muto, T.  
284 Tanikawa, K. R. Taylor, N. Komatsu, K. Yoshimatsu, H. Thi Thu Ha, M. Ohnishi, Multiple-locus  
285 variable-number tandem repeat analysis of *Leptospira interrogans* and *Leptospira borgpetersenii* isolated  
286 from small feral and wild mammals in East Asia. *Infect. Genet. Evol. J. Mol. Epidemiol. Evol. Genet. Infect.*  
287 *Dis.* **36**, 434–440 (2015).
- 288 28. W.-N. Zhu, L.-L. Huang, L.-B. Zeng, X.-R. Zhuang, C.-Y. Chen, Y.-Z. Wang, J.-H. Qin, Y.-Z. Zhu, X.-K. Guo,  
289 Isolation and characterization of two novel plasmids from pathogenic *Leptospira interrogans* serogroup  
290 Canicola serovar Canicola strain Gui44. *PLoS Negl. Trop. Dis.* **8**, e3103 (2014).
- 291 29. M. Picardeau, Conjugative transfer between *Escherichia coli* and *Leptospira* spp. as a new genetic tool. *Appl.*  
292 *Environ. Microbiol.* **74**, 319–322 (2008).
- 293 30. L. Slamti, M. Picardeau, Construction of a library of random mutants in the spirochete *Leptospira biflexa*  
294 using a *mariner* transposon. *Methods Mol. Biol. Clifton NJ.* **859**, 169–176 (2012).

295

296 **Acknowledgments** We thank Dr. H. Nishimura (Sendai Medical Center) and Dr. C. Toma  
297 (University of the Ryukyus) for the generous gift of animal cell lines; and Dr. E. Isogai (Tohoku  
298 University) and Dr. H. Yoneyama (Tohoku University) for the experiment reagents and the insightful  
299 discussion. This work was supported by the JSPS KAKENHI: 18K07100 for SN and 18J10834 for  
300 JX.

301

302 **Author contributions** J.X., N.K. and S.N. planned the project; J.X and N.K. carried out the

303 experiments; S.N. set up the optical system and programs for data analysis; J.X. and S.N. analyzed  
304 the data; J.X., N.K. and S.N. wrote the paper.

305

306 **Competing interests** The authors declare that they have no competing interests.

307

308 **Materials & Correspondence** Shuichi Nakamura; Department of Applied Physics, Graduate School  
309 of Engineering, Tohoku University, 6-6-05 Aoba, Aoba-ku, Sendai, Miyagi 980-8579, Japan;

310 [naka@bp.apph.tohoku.ac.jp](mailto:naka@bp.apph.tohoku.ac.jp)

311

312 **Data availability** The data supporting the findings of this study are available from the corresponding  
313 author upon request.

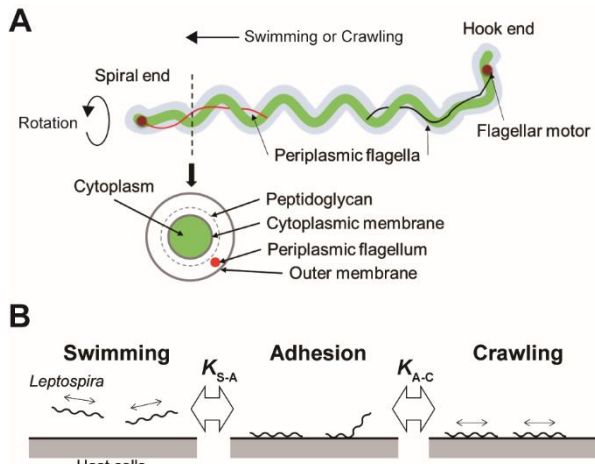

314

315 **Fig. 1. Structure of *Leptospira* and working model.** (A) Schematic diagram of the *Leptospira* cell

316 structure. (B) A three-state kinetic model assuming a transition between “swimming” (floating above

317 cell layers without physical contact to the cells) and “adhesion” (attachment to the cell layer without

318 migration), and between “adhesion” and “crawling” (attachment to the cell layer and movement over

319 surfaces), with  $K_{S-A}$  and  $K_{A-C}$  represent the equilibrium constants of each transition, respectively.

320



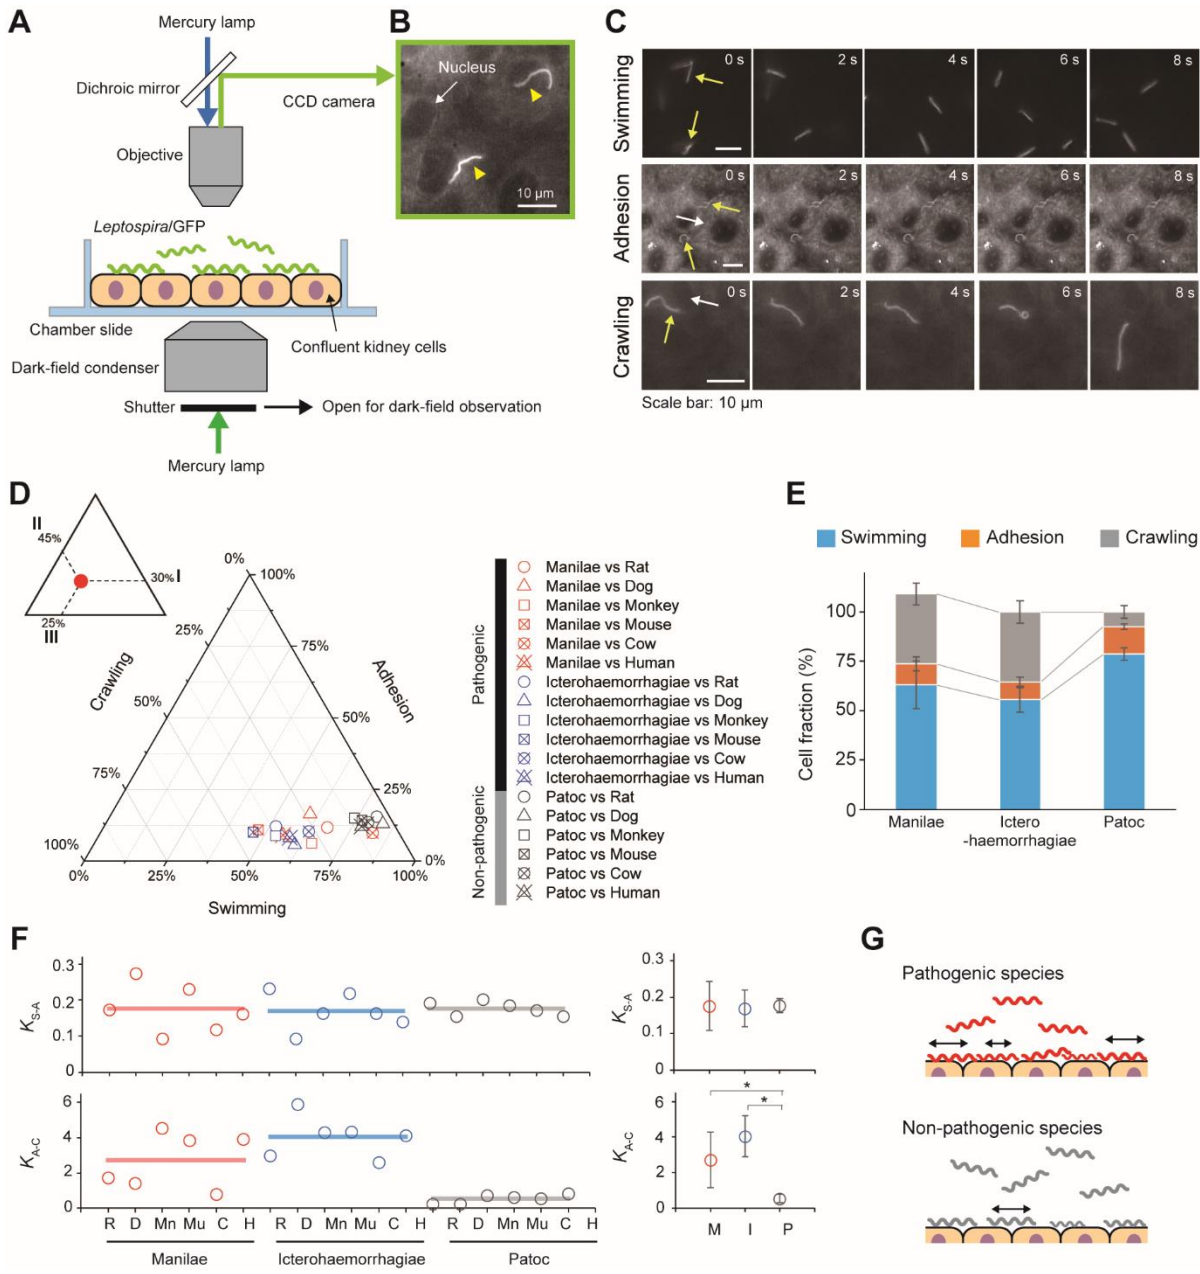

321

322 **Fig. 2. Steady-state motility and adhesion of *Leptospira* cells on kidney cells.** (A) Schematic of

323 the motility assay on the cultured kidney cells by epi-fluorescent microscopy. Fully confluent kidney

324 cells from either animals or humans were cultured in an observation chamber, and *Leptospira* cells

325 that constitutively expressed GFP were added to the cultures. (B) Example of an epi-fluorescence

326 image of the *L. interrogans* serovar Icterohaemorrhagiae, as indicated by the yellow triangles, on the

327 rat kidney cell line, NRK-52E. The nucleus of the kidney cell is shown by the white arrow (Movie

328 S1). (C) Image sequences of swimming (top), adhered (middle), and crawling (bottom) leptospiral

329 cells. Yellow and white arrows indicate *Leptospira* cells and kidney cells, respectively. No kidney  
330 cells were observed due to out of focus during the measurement of *Leptospira* cells swimming in  
331 liquid media. (D) Ternary plot of the cell fractions in a state of swimming, adhesion, or crawling. The  
332 inset schematically explains how to read the ternary plot using an example plot with 30% for I, 45%  
333 for II, and 25% for III. Legend is shown to the right of the ternary plot, and M, I and P indicate the *L.*  
334 *interrogans* serovar Manilae, *L. interrogans* serovar Icterohaemorrhagiae, and *L. biflexa* serovar  
335 Patoc, respectively. Each data point represents the mean of triplicate experiments and ~ 2,400  
336 leptospiral cells were measured per host-serovar pair. (E) Average values of the cell fractions. Error  
337 bars are the standard deviation. (F) The host-bacterium dependence of the equilibrium constants  $K_{S-A}$   
338 and  $K_{A-C}$ , calculated from the data shown in **D**; rat (R), dog (D), monkey (Mn), mouse (Mu), cow (C),  
339 and human (H). The averaged values determined for each bacterial strain are shown by horizontal  
340 lines and are plotted with the standard deviation in the right; *L. interrogans* Manilae (M), *L.*  
341 *interrogans* Icterohaemorrhagiae (I), and *L. biflexa* Patoc I (P). The statistical analysis was  
342 performed by Mann-Whitney U test (\*  $P < 0.05$ ). (G) Schematic explanation of the kinetic difference  
343 between pathogenic and non-pathogenic leptospires.

344

345

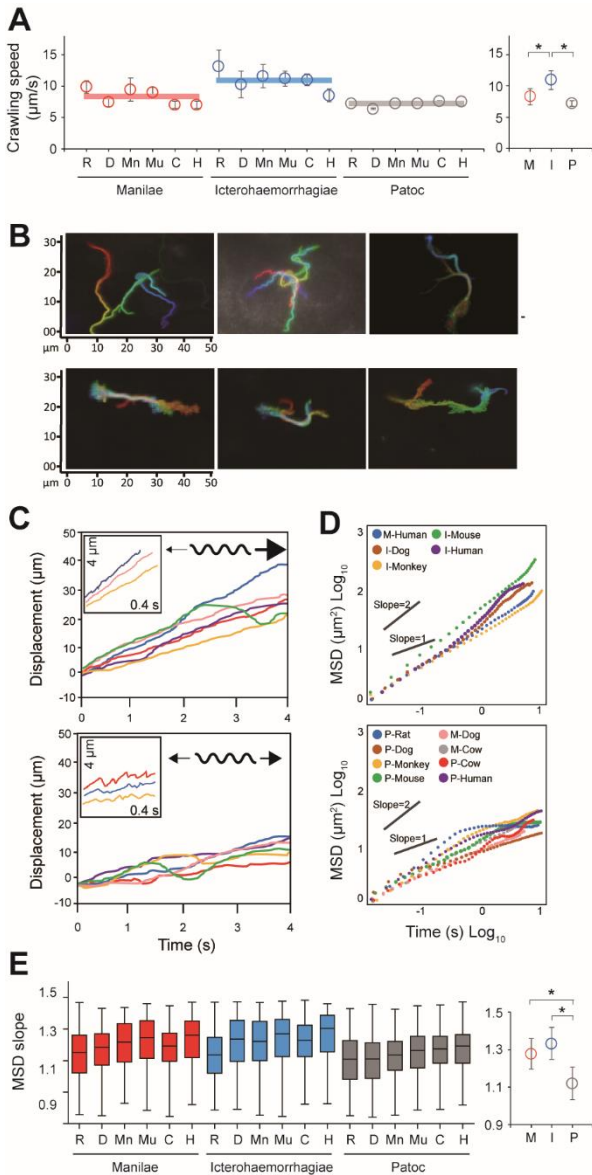

346

347 **Fig. 3. Analysis of the crawling movement of *Leptospira* on kidney cell layers. (A) Average**

348 crawling speeds determined for each host-bacterium pair. More than 90 bacteria were measured for

349 each pair. The averaged values calculated for each bacterial strain are shown by horizontal lines (left)

350 and are plotted with the were (B) Examples of persistent crawling (upper panels) and diffusive

351 crawling (lower panels) of *Leptospira* cells obtained by single-cell tracking in 10 s. Colors indicate

352 time courses in the order of red orange yellow green blue, and indigo. (C) Example time courses of

353 leptospires crawling on the kidney cell surfaces; inset, expanded view of cell displacements and

354 schematics of motion patterns. The upper and lower panels show the long-distance migration

355 represented by directive crawling and the limited migration due to frequent reversal, respectively.

356 (D) Examples of MSD vs time plots, evaluating the directivity of individual leptospiral cell

357 movements: Plots with slopes  $\sim 2$  indicate persistently directive crawling (upper), whereas those with

358  $\sim 1$  indicate a non-directional movement (lower), i.e., motion with high frequency of reversal

359 patterns and short net migration distance (refer to the schematic explanation of motion pattern in

360 insets of C). (E) MSD slopes determined for each host-bacterium pair. The boxes show the 25th (the

361 bottom line), 50th (middle), and 75th (top) percentiles, and the vertical bars show the minimum and

362 maximum values. The right panel show the strain-dependence of the medians. The statistical analysis

363 was performed by Mann-Whitney U test (\*  $P < 0.05$ ).

364

365

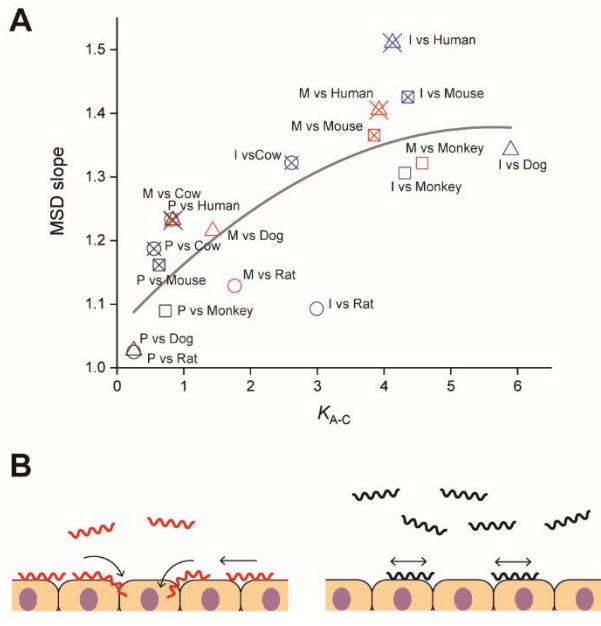

366

367 **Fig. 4. Correlation of adhesion, motility and pathogenicity.** (A) Relationship between  $K_{A-C}$  and

368 MSD slope (i.e., crawling persistency). The gray line is the result of quadratic curve fitting. The

369 correlation coefficient is 0.77. See Fig. 2D for symbols. (B) A plausible model for

370 crawling-dependent pathogenicity of *Leptospira*. In the cases that lead to severe symptoms (left),

371 leptospiral cells were biased to the crawling state, and most of the crawling cells showed directional

372 translation persistently over host tissue surfaces, increasing the invasion probability. For the

373 asymptomatic or non-infectious cases, many leptospires remained in the swimming state and might

374 be removed through body fluids or urination. Some fractions of the adhered leptospires were able to

375 crawl, but their migration distances were limited due to frequent reversal.

376

377 **Supplementary Materials**

378 Title: Insight into motility-dependent pathogenicity of the zoonotic spirochete *Leptospira*

379 Authors: Jun Xu, Nobuo Koizumi, Shuichi Nakamura

380 Correspondence to: [naka@bp.apph.tohoku.ac.jp](mailto:naka@bp.apph.tohoku.ac.jp)

381

382 **This file includes:**

383 Tables S1. Primer sequences used in this study

384 Fig. S1. Explanation of MSD plot.

385 Fig. S2. Histograms of the MSD slopes

386 Fig. S3. Effect of GFP expression on the *Leptospira* motility.

387

388 **Other Supplementary Materials for this manuscript include the following:**

389 Movie S1. Epi-fluorescent images of *L. interrogans* on the rat kidney cell

390 Movie S2. Progressive, long-distance crawling of *L. interrogans* on the monkey kidney cells

391 Movie S3. Crawling of *L. interrogans* with highly frequent reversal on the dog kidney cells

392

393 **Table S1. Primer sequences used in this study**

| Target                            | Primer sequence (5' → 3')                |                                        |
|-----------------------------------|------------------------------------------|----------------------------------------|
|                                   | Forward                                  | Reverse                                |
| <i>rep-parB-parA</i> (pGui1)      | TCGACGCCGGCCAGCGTTACTTCATAGCATCTTGGTTC   | GCTGGAGCTCCACCGGCTCGACTCTTACGGTGTGTTAG |
| pNKLIG1<br>(pCjSpLe94 derivative) | CGGTGGAGCTCCAGCTTTG                      | GCTGGCCGGCGTCGAAAAGTAAGCACCTGTTATTGC   |
| <i>flgC</i> promoter              | TATCGATACCGTCGACCCGAGCTTCAAGGAAGATTTCTTA | ATGGAAACCTCCCTCATTTA                   |
| AcGFP                             | GAGGGAGGTTTCCATATGACCATGATTACGCCAAGC     | TATCGATACCGTCGATCACTTGTACAGCTCATCCATG  |

394

395

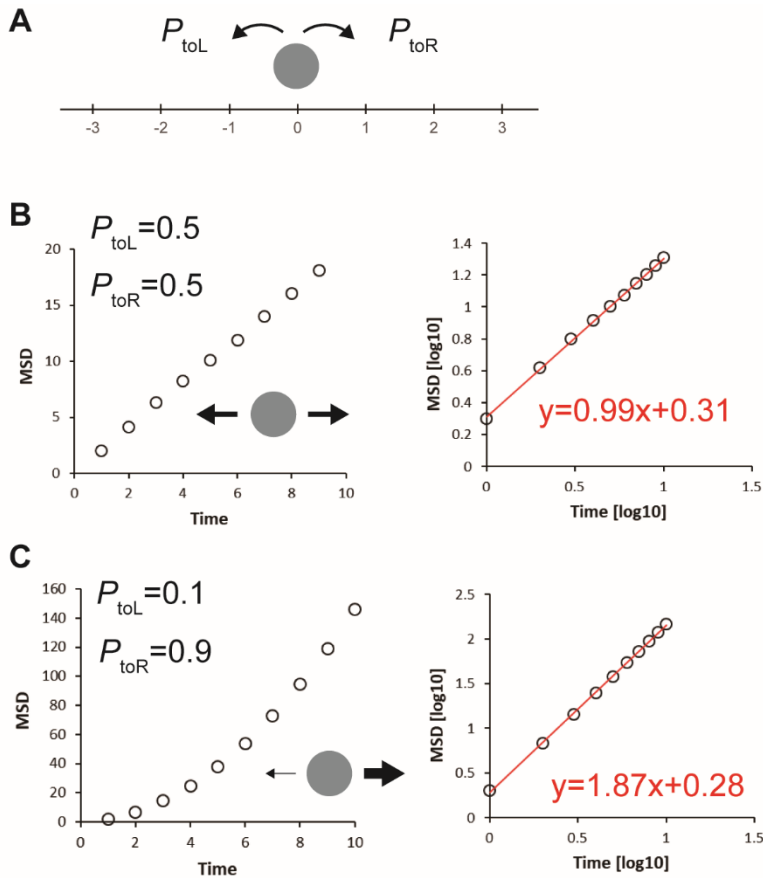

396

397 **Fig. S1. Explanation of MSD plot.** (A) To explain the difference in MSD vs time plot of “directed  
398 movement” (Figs. 3B-C upper) from that of “diffusive movement” (Figs. 3B-C lower), we performed  
399 a computer simulation by considering a particle stepping to the left ( $-1$ ) or to the right ( $+1$ ) with the  
400 probability of  $P_{\text{toL}}$  and  $P_{\text{toR}} (= 1 - P_{\text{toL}})$ , respectively, in a time interval  $\Delta t$ .  $P_{\text{toL}} = 0.5$  ( $P_{\text{toR}} = 0.5$ ) and  
401  $P_{\text{toL}} = 0.1$  ( $P_{\text{toR}} = 0.9$ ) were assumed for simulating simple diffusion and movement biased to the  
402 right, respectively, and the step direction was determined by a random number ( $rnd$ ) from 0.0 to 1.0  
403 generated in each event: If  $rnd < P_{\text{toL}}$ , the particle steps to the left ( $+1$ ). The time course of the  
404 particle position was analyzed as shown in Methods. MSD vs time plots obtained by the simulation  
405 show that (B) simple diffusion and (C) directed movement give a linear line and a quadratic curve,  
406 respectively (left panels), therefore exhibiting linear lines with slopes of  $\sim 1$  and  $\sim 2$  in  
407 double-logarithmic plots (right panels). Red lines are regression lines fitted to data points obtained  
408 by simulation.



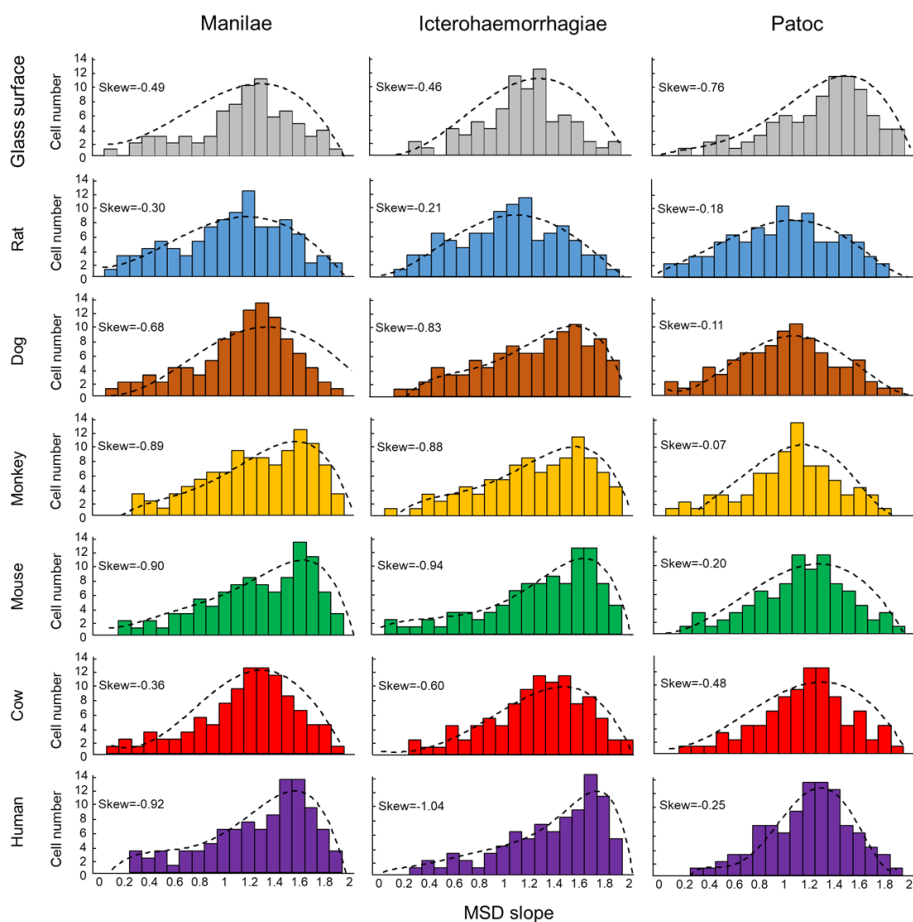

409

410 **Fig. S2. Histograms of the MSD slopes. Dashed lines are the results of curve fitting.**

411

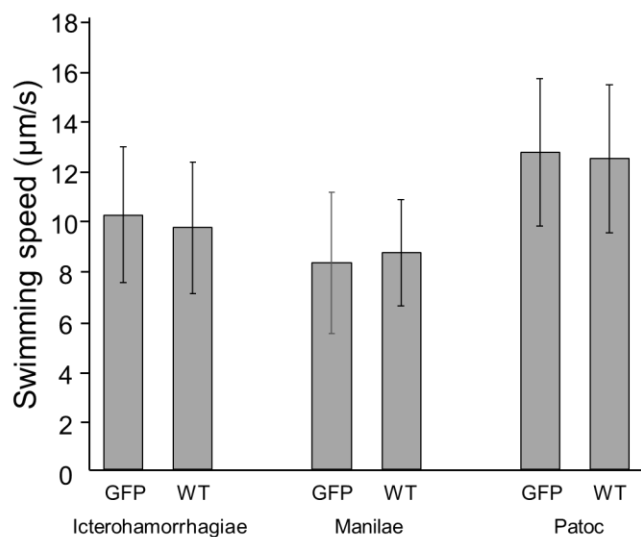

412

413 **Fig. S3. Effect of GFP expression on the *Leptospira* motility.** No significant difference found  
414 between the swimming speeds of GFP expressing strains and wild type strains in each serovar.

415

416
